# Supplementary material
Source: Springer Nature journal article supplement (https://www.springermedizin.de/resource/supplementary/12958_2003_112_MOESM6_ESM.pdf/9566146)
Supplement: MOESM6 [file 9566146]

| Sham Operated |        |                |              | Castrated |        |                |              | Castrated Testosterone |        |                |              |
|---------------|--------|----------------|--------------|-----------|--------|----------------|--------------|------------------------|--------|----------------|--------------|
| Caput         | Corpus | Proximal cauda | Distal cauda | Caput     | Corpus | Proximal cauda | Distal cauda | Caput                  | Corpus | Proximal cauda | Distal cauda |

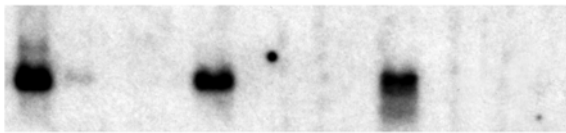

-18S

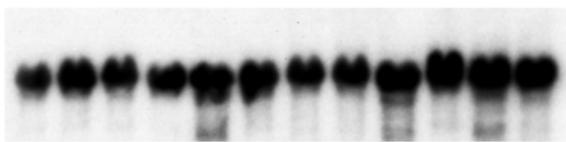

-18S
